# Supplementary material for: Genetic Mapping Reveals Novel Exotic and Elite QTL Alleles for Salinity Tolerance in Barley
Source: MDPI journal article supplement (doi:10.3390/agronomy11091774), 2021-09-03
Supplement: s1 [file s1]

**Table S1.** Mean comparison and summary statistics of all studied traits for parents and S42 population under each salinity level and each growing season.

| Trait | Year | Salinity level | Parents* |          | S42 population |       |       |       |        |
|-------|------|----------------|----------|----------|----------------|-------|-------|-------|--------|
|       |      |                | Scarlett | ISR 42-8 | Mean           | SD    | Min.  | Max.  | CV (%) |
| HD    | Y1   | L1             | 77.3b    | 89.0a    | 76.3a          | 6.0   | 62.0  | 88.0  | 7.9    |
|       |      | L2             | 66.3b    | 76.0a    | 68.5b          | 5.7   | 52.0  | 83.0  | 8.3    |
|       | Y2   | L1             | 75.3b    | 84.7a    | 76.5a          | 6.2   | 60.0  | 89.0  | 8.1    |
|       |      | L2             | 66.0b    | 73.7a    | 69.4b          | 6.1   | 53.0  | 85.0  | 8.8    |
| PH    | Y1   | L1             | 48.3b    | 61.3a    | 58.6a          | 8.1   | 35.0  | 88.0  | 13.9   |
|       |      | L2             | 40.7b    | 71.7a    | 47.9b          | 8.9   | 29.0  | 79.0  | 18.7   |
|       | Y2   | L1             | 53.3b    | 68.0a    | 62.2a          | 8.0   | 41.0  | 91.0  | 12.9   |
|       |      | L2             | 47.3b    | 61.3a    | 51.0b          | 8.4   | 32.0  | 79.0  | 16.5   |
| NSPLM | Y1   | L1             | 285.0a   | 243.0b   | 264.5a         | 57.9  | 117.0 | 433.0 | 21.9   |
|       |      | L2             | 232.7a   | 174.0b   | 192.8b         | 50.0  | 79.0  | 384.0 | 25.9   |
|       | Y2   | L1             | 290.3a   | 248.3b   | 273.8a         | 58.8  | 134.0 | 460.0 | 21.5   |
|       |      | L2             | 223.0a   | 174.0b   | 199.8b         | 47.6  | 92.0  | 370.0 | 23.8   |
| GWPLM | Y1   | L1             | 352.5a   | 170.1b   | 314.9a         | 104.0 | 88.9  | 698.9 | 33.0   |
|       |      | L2             | 133.6a   | 92.7b    | 131.5b         | 49.5  | 46.8  | 426.0 | 37.7   |
|       | Y2   | L1             | 372.6a   | 191.4b   | 344.5a         | 109.3 | 93.2  | 699.1 | 31.7   |
|       |      | L2             | 138.7a   | 102.0b   | 146.7b         | 55.1  | 50.6  | 517.1 | 37.5   |
| BWPLM | Y1   | L1             | 962.7a   | 718.0b   | 879.4a         | 297.0 | 234.0 | 2234  | 33.8   |
|       |      | L2             | 372.3b   | 480.1a   | 404.0b         | 154.3 | 145.0 | 1351  | 38.2   |
|       | Y2   | L1             | 882.7a   | 759.7b   | 962.0a         | 315.6 | 237.0 | 2094  | 32.8   |
|       |      | L2             | 385.3b   | 492.9a   | 457.8b         | 175.1 | 147.0 | 1597  | 38.2   |
| HI    | Y1   | L1             | 36.7a    | 23.7b    | 36.0a          | 2.6   | 28.0  | 43.0  | 7.2    |
|       |      | L2             | 36.0a    | 19.3b    | 32.7b          | 1.8   | 27.0  | 39.0  | 5.5    |
|       | Y2   | L1             | 42.2a    | 25.2b    | 36.0a          | 2.8   | 27.0  | 46.0  | 7.7    |
|       |      | L2             | 36.0a    | 20.7b    | 32.2b          | 1.8   | 26.0  | 37.0  | 5.5    |
| TGW   | Y1   | L1             | 44.9a    | 31.1b    | 40.2a          | 4.5   | 26.6  | 53.8  | 11.3   |
|       |      | L2             | 37.6a    | 23.7b    | 32.6b          | 4.3   | 22.1  | 42.7  | 13.2   |
|       | Y2   | L1             | 44.1a    | 30.4b    | 39.5a          | 4.4   | 26.1  | 53.0  | 11.2   |
|       |      | L2             | 37.2a    | 23.4b    | 32.2b          | 4.3   | 21.8  | 42.3  | 13.2   |

HD is heading date (days), PH is plant height (cm), NSPLM is number of spikes per linear meter (spikes  $\text{lm}^{-1}$ ), GWPLM is grain weight per linear meter ( $\text{g lm}^{-1}$ ), BWPLM is biological weight per linear meter ( $\text{g lm}^{-1}$ ), HI is harvest index (%), and TGW is thousand grain weight (g). Y1 (season 2017-2018), Y2 (season 2018-2019), L1 is salinity level 1, and L2 salinity level 2. \* Difference between parents using Duncan's test, means *with the same letter* are not significantly different.

**Table S2.** Reduction percentage (R%) and salinity tolerance index (STI) for parents and S42 population calculated for all studied traits.

| Trait | Year    | ISR 42-8 |      | Scarlett |      | S42 population |       |       |       |
|-------|---------|----------|------|----------|------|----------------|-------|-------|-------|
|       |         | R%       | STI  | R%       | STI  | R%             | STI   |       |       |
|       |         |          |      |          |      |                | mean  | min.  | max.  |
| HD    | Y1      | -14.2    | 0.85 | -14.6    | 0.87 | -10.1          | 0.996 | 0.643 | 1.385 |
|       | Y2      | -12.4    | 0.83 | -13      | 0.87 | -9.2           | 0.997 | 0.657 | 1.356 |
|       | Average | -13.30   | 0.84 | -13.80   | 0.87 | -9.65          | 1.00  | 0.643 | 1.385 |
| PH    | Y1      | -15.9    | 1.21 | 16.8     | 0.86 | -18.3          | 1.017 | 0.479 | 1.878 |
|       | Y2      | -11.3    | 0.87 | -9.8     | 0.91 | -18.1          | 1.012 | 0.505 | 1.780 |
|       | Average | -13.60   | 1.04 | 3.50     | 0.88 | -18.20         | 1.01  | 0.479 | 1.878 |
| NSPLM | Y1      | -18.4    | 0.67 | -28.4    | 0.81 | -27.1          | 1.052 | 0.155 | 2.947 |
|       | Y2      | -23.2    | 0.67 | -29.9    | 0.81 | -27            | 1.045 | 0.221 | 2.558 |
|       | Average | -20.80   | 0.67 | -29.15   | 0.81 | -27.05         | 1.05  | 0.155 | 2.947 |
| GWPLM | Y1      | -62.1    | 0.50 | -45.5    | 0.37 | -58.2          | 1.045 | 0.093 | 5.941 |
|       | Y2      | -62.8    | 0.48 | -46.7    | 0.38 | -57.4          | 1.022 | 0.112 | 5.188 |
|       | Average | -62.45   | 0.49 | -46.10   | 0.37 | -57.80         | 1.03  | 0.093 | 5.941 |
| BWPLM | Y1      | -61.3    | 0.52 | -33.1    | 0.43 | -54.1          | 1.051 | 0.095 | 5.638 |
|       | Y2      | -56.3    | 0.46 | -35.1    | 0.42 | -52.4          | 1.031 | 0.094 | 4.422 |
|       | Average | -58.80   | 0.49 | -34.10   | 0.42 | -53.25         | 1.04  | 0.094 | 5.638 |
| HI    | Y1      | -1.8     | 0.96 | -18.7    | 0.87 | -9.3           | 1.004 | 0.747 | 1.229 |
|       | Y2      | -14.7    | 1.03 | -17.9    | 0.90 | -10.8          | 1.002 | 0.785 | 1.360 |
|       | Average | -8.25    | 1.00 | -18.30   | 0.89 | -10.05         | 1.00  | 0.747 | 1.360 |
| TGW   | Y1      | -16.2    | 0.75 | -23.7    | 0.83 | -18.9          | 1.004 | 0.476 | 1.733 |
|       | Y2      | -15.6    | 0.76 | -23.2    | 0.83 | -18.5          | 1.004 | 0.477 | 1.728 |
|       | Average | -15.90   | 0.76 | -23.45   | 0.83 | -18.70         | 1.00  | 0.477 | 1.733 |

HD is heading date (days), PH is plant height (cm), NSPLM is number of spikes per linear meter (spikes  $\text{lm}^{-1}$ ), GWPLM is grain weight per linear meter ( $\text{g lm}^{-1}$ ), BWPLM is biological weight per linear meter ( $\text{g lm}^{-1}$ ), HI is harvest index (%), and TGW is thousand grain weight (g). Y1 (season 2017-2018), Y2 (season 2018-2019), L1 is salinity level 1, and L2 salinity level 2.

**Table S3.** Average of salinity tolerance index (STI) for measured traits across two growing seasons.

| <b>DHL</b> | <b>HD</b> | <b>PH</b> | <b>NSPLM</b> | <b>GWPLM</b> | <b>BWPLM</b> | <b>HI</b> | <b>TGW</b> |
|------------|-----------|-----------|--------------|--------------|--------------|-----------|------------|
| SI001      | 0.655     | 1.358     | 1.578        | 2.902        | 3.140        | 0.918     | 1.216      |
| SI002      | 0.943     | 1.726     | 0.486        | 0.355        | 0.373        | 0.940     | 0.877      |
| SI003      | 0.969     | 1.830     | 0.483        | 0.578        | 0.577        | 0.988     | 1.004      |
| SI004      | 0.875     | 1.317     | 0.943        | 0.827        | 0.860        | 0.955     | 1.093      |
| SI005      | 0.798     | 1.379     | 1.467        | 1.506        | 1.560        | 0.969     | 1.089      |
| SI006      | 0.870     | 1.591     | 0.530        | 0.426        | 0.511        | 0.841     | 0.950      |
| SI007      | 0.833     | 1.518     | 0.683        | 0.552        | 0.561        | 0.976     | 0.923      |
| SI008      | 0.878     | 1.235     | 0.599        | 0.314        | 0.321        | 0.969     | 1.053      |
| SI009      | 0.746     | 1.207     | 1.316        | 0.991        | 1.005        | 0.981     | 0.906      |
| SI010      | 0.937     | 0.665     | 0.522        | 0.437        | 0.416        | 1.044     | 1.268      |
| SI011      | 0.723     | 1.591     | 1.447        | 0.975        | 1.009        | 0.955     | 0.996      |
| SI012      | 0.717     | 0.902     | 1.566        | 0.391        | 0.421        | 0.931     | 0.806      |
| SI013      | 1.181     | 1.044     | 0.278        | 0.215        | 0.225        | 0.953     | 0.727      |
| SI014      | 0.942     | 1.216     | 0.447        | 0.279        | 0.291        | 0.954     | 0.756      |
| SI015      | 0.696     | 1.091     | 1.461        | 0.911        | 0.979        | 0.922     | 0.730      |
| SI016      | 0.803     | 1.202     | 0.436        | 0.692        | 0.718        | 0.948     | 0.991      |
| SI017      | 0.768     | 1.420     | 0.923        | 0.476        | 0.498        | 0.945     | 0.669      |
| SI018      | 1.003     | 1.111     | 0.638        | 0.580        | 0.602        | 0.955     | 0.889      |
| SI019      | 0.789     | 0.843     | 0.894        | 0.638        | 0.654        | 0.963     | 0.744      |
| SI020      | 0.965     | 0.974     | 0.693        | 0.790        | 0.804        | 0.967     | 0.800      |
| SI021      | 0.718     | 1.007     | 1.109        | 0.536        | 0.512        | 1.035     | 0.946      |
| SI022      | 1.069     | 0.885     | 0.530        | 0.398        | 0.428        | 0.925     | 0.766      |
| SI023      | 0.718     | 1.261     | 0.837        | 0.738        | 0.845        | 0.866     | 1.207      |
| SI026      | 0.855     | 1.208     | 0.720        | 0.668        | 0.651        | 1.014     | 0.889      |
| SI027      | 0.949     | 0.796     | 0.581        | 0.440        | 0.418        | 1.045     | 0.851      |
| SI028      | 0.713     | 1.066     | 1.531        | 1.635        | 1.670        | 0.977     | 1.161      |
| SI029      | 0.646     | 1.051     | 2.075        | 1.265        | 1.274        | 0.988     | 0.651      |
| SI030      | 0.968     | 0.658     | 0.722        | 0.446        | 0.473        | 0.939     | 0.838      |
| SI031      | 0.714     | 0.971     | 0.640        | 0.648        | 0.659        | 0.972     | 0.965      |
| SI032      | 0.747     | 0.716     | 1.283        | 1.475        | 1.715        | 0.852     | 0.973      |
| SI033      | 0.681     | 0.953     | 1.087        | 0.396        | 0.397        | 0.990     | 1.027      |
| SI034      | 0.952     | 0.817     | 0.529        | 0.550        | 0.620        | 0.887     | 0.891      |
| SI035      | 0.933     | 0.660     | 2.075        | 1.536        | 1.655        | 0.922     | 0.786      |
| SI036      | 1.203     | 0.664     | 0.179        | 0.154        | 0.148        | 1.020     | 0.646      |
| SI038      | 0.761     | 0.684     | 1.270        | 0.714        | 0.755        | 0.934     | 0.565      |
| SI039      | 0.959     | 0.890     | 1.166        | 0.601        | 0.664        | 0.897     | 0.760      |
| SI040      | 0.923     | 0.800     | 0.882        | 0.551        | 0.559        | 0.977     | 0.651      |
| SI041      | 0.949     | 0.924     | 0.623        | 0.561        | 0.615        | 0.902     | 0.907      |
| SI042      | 0.944     | 0.984     | 0.659        | 1.037        | 1.120        | 0.931     | 1.025      |
| SI043      | 0.687     | 1.211     | 1.727        | 2.421        | 2.734        | 0.885     | 1.178      |
| SI044      | 0.646     | 1.095     | 1.943        | 2.340        | 2.548        | 0.912     | 1.095      |
| SI045      | 0.986     | 1.052     | 0.560        | 0.847        | 0.882        | 0.949     | 1.101      |
| SI046      | 0.859     | 1.295     | 0.834        | 1.206        | 1.130        | 1.064     | 1.175      |
| SI047      | 0.985     | 1.063     | 0.469        | 0.502        | 0.567        | 0.882     | 0.970      |
| SI048      | 0.926     | 0.876     | 0.548        | 0.811        | 0.937        | 0.851     | 1.035      |
| SI049      | 0.880     | 1.310     | 0.726        | 0.532        | 0.594        | 0.883     | 1.094      |
| SI050      | 0.681     | 1.215     | 1.050        | 0.784        | 0.828        | 0.948     | 0.775      |

Table S3. Continued.

| <b>DHL</b> | <b>HD</b> | <b>PH</b> | <b>NSPLM</b> | <b>GWPLM</b> | <b>BWPLM</b> | <b>HI</b> | <b>TGW</b> |
|------------|-----------|-----------|--------------|--------------|--------------|-----------|------------|
| SI051      | 1.080     | 1.194     | 0.265        | 0.268        | 0.264        | 1.014     | 0.863      |
| SI052      | 0.863     | 1.105     | 0.711        | 0.386        | 0.411        | 0.945     | 0.925      |
| SI053      | 1.084     | 0.921     | 0.260        | 0.393        | 0.424        | 0.922     | 0.912      |
| SI054      | 0.993     | 0.889     | 0.569        | 0.380        | 0.375        | 1.013     | 0.702      |
| SI055      | 0.969     | 1.057     | 0.545        | 0.214        | 0.221        | 0.954     | 0.793      |
| SI056      | 0.908     | 0.908     | 0.710        | 0.345        | 0.345        | 0.985     | 0.620      |
| SI057      | 0.848     | 0.966     | 0.608        | 0.395        | 0.377        | 1.035     | 0.785      |
| SI058      | 0.811     | 1.045     | 0.784        | 0.611        | 0.658        | 0.914     | 0.790      |
| SI059      | 0.984     | 1.026     | 0.759        | 0.690        | 0.729        | 0.936     | 0.783      |
| SI060      | 1.180     | 1.788     | 0.217        | 0.264        | 0.290        | 0.892     | 1.176      |
| SI061      | 1.050     | 1.529     | 0.675        | 0.613        | 0.656        | 0.921     | 1.116      |
| SI062      | 0.963     | 1.297     | 0.670        | 0.570        | 0.580        | 0.970     | 0.922      |
| SI063      | 0.926     | 0.999     | 0.720        | 0.373        | 0.400        | 0.920     | 0.621      |
| SI064      | 0.848     | 0.684     | 0.700        | 0.466        | 0.523        | 0.874     | 0.677      |
| SI065      | 1.012     | 1.097     | 0.247        | 0.160        | 0.162        | 0.973     | 0.659      |
| SI066      | 0.853     | 0.679     | 0.624        | 0.280        | 0.310        | 0.888     | 0.694      |
| SI067      | 0.970     | 1.074     | 0.470        | 0.328        | 0.358        | 0.899     | 0.628      |
| SI068      | 0.904     | 0.815     | 0.711        | 0.653        | 0.700        | 0.924     | 0.780      |
| SI070      | 0.855     | 0.967     | 0.621        | 0.433        | 0.485        | 0.888     | 0.935      |
| SI071      | 0.923     | 1.155     | 0.517        | 0.431        | 0.507        | 0.855     | 0.798      |
| SI072      | 0.947     | 1.261     | 0.610        | 0.285        | 0.331        | 0.857     | 0.529      |
| SI073      | 0.981     | 1.020     | 0.584        | 0.593        | 0.642        | 0.932     | 0.593      |
| SI074      | 0.929     | 0.759     | 0.695        | 0.605        | 0.611        | 0.980     | 0.878      |
| SI075      | 1.036     | 0.802     | 0.458        | 0.376        | 0.387        | 0.965     | 0.751      |
| SI076      | 0.859     | 1.071     | 0.832        | 0.469        | 0.473        | 0.980     | 0.771      |
| SI077      | 0.929     | 0.966     | 0.509        | 0.461        | 0.498        | 0.917     | 0.945      |
| SI078      | 1.025     | 1.038     | 0.601        | 0.409        | 0.463        | 0.885     | 0.824      |
| SI079      | 0.962     | 0.820     | 0.784        | 0.417        | 0.429        | 0.960     | 0.882      |
| SI080      | 0.963     | 0.875     | 0.792        | 0.491        | 0.459        | 1.054     | 0.759      |
| SI081      | 0.946     | 1.095     | 0.712        | 0.599        | 0.614        | 0.970     | 1.012      |
| SI082      | 0.983     | 0.835     | 0.606        | 0.198        | 0.226        | 0.889     | 0.837      |
| SI084      | 1.079     | 0.979     | 0.559        | 0.335        | 0.335        | 0.988     | 0.938      |
| SI085      | 1.088     | 1.139     | 0.317        | 0.084        | 0.087        | 0.956     | 0.633      |
| SI086      | 1.101     | 0.597     | 0.462        | 0.223        | 0.221        | 1.002     | 0.547      |
| SI087      | 0.994     | 0.734     | 0.602        | 0.323        | 0.359        | 0.900     | 0.681      |
| SI088      | 0.916     | 0.909     | 0.658        | 0.244        | 0.290        | 0.832     | 1.097      |
| SI089      | 1.022     | 0.854     | 0.298        | 0.215        | 0.281        | 0.762     | 0.904      |
| SI090      | 1.017     | 0.743     | 0.533        | 0.166        | 0.182        | 0.903     | 0.853      |
| SI091      | 0.805     | 1.053     | 1.047        | 0.565        | 0.656        | 0.857     | 0.835      |
| SI092      | 1.108     | 1.088     | 0.598        | 0.245        | 0.276        | 0.884     | 0.923      |
| SI093      | 0.933     | 1.364     | 0.560        | 0.250        | 0.284        | 0.865     | 1.098      |
| SI094      | 0.771     | 0.672     | 0.790        | 0.521        | 0.579        | 0.889     | 0.511      |
| SI095      | 0.856     | 0.907     | 0.767        | 0.329        | 0.385        | 0.847     | 0.493      |
| SI096      | 1.011     | 0.777     | 0.530        | 0.193        | 0.235        | 0.813     | 0.768      |
| SI097      | 0.946     | 0.642     | 0.654        | 0.404        | 0.443        | 0.921     | 0.718      |
| SI098      | 0.850     | 0.646     | 0.966        | 0.398        | 0.407        | 0.967     | 0.567      |
| SI099      | 0.996     | 0.893     | 0.408        | 0.145        | 0.167        | 0.860     | 0.485      |
| SI100      | 0.893     | 0.931     | 0.771        | 0.216        | 0.244        | 0.875     | 0.534      |

Table S3. Continued.

| <b>DHL</b> | <b>HD</b> | <b>PH</b> | <b>NSPLM</b> | <b>GWPLM</b> | <b>BWPLM</b> | <b>HI</b> | <b>TGW</b> |
|------------|-----------|-----------|--------------|--------------|--------------|-----------|------------|
| SI101      | 0.914     | 0.875     | 0.771        | 0.289        | 0.304        | 0.941     | 0.736      |
| SI102      | 0.954     | 0.951     | 0.285        | 0.180        | 0.204        | 0.868     | 0.852      |
| SI103      | 0.836     | 0.633     | 0.767        | 0.289        | 0.336        | 0.847     | 1.004      |
| SI104      | 0.988     | 0.882     | 0.280        | 0.204        | 0.227        | 0.888     | 0.727      |
| SI106      | 0.905     | 0.799     | 0.663        | 0.826        | 0.962        | 0.847     | 0.989      |
| SI107      | 0.975     | 0.649     | 1.283        | 0.573        | 0.746        | 0.770     | 0.452      |
| SI108      | 0.851     | 0.565     | 0.980        | 0.332        | 0.370        | 0.885     | 0.699      |
| SI109      | 1.136     | 0.972     | 0.788        | 0.320        | 0.346        | 0.922     | 0.839      |
| SI111      | 1.005     | 0.800     | 0.856        | 0.343        | 0.384        | 0.895     | 0.556      |
| SI112      | 1.104     | 0.684     | 1.124        | 0.336        | 0.387        | 0.854     | 0.582      |
| SI113      | 1.047     | 0.874     | 1.445        | 0.372        | 0.426        | 0.863     | 0.514      |
| SI114      | 1.075     | 0.942     | 1.236        | 0.500        | 0.610        | 0.811     | 0.748      |
| SI115      | 1.139     | 1.186     | 1.042        | 0.450        | 0.539        | 0.831     | 0.519      |
| SI116      | 1.191     | 0.646     | 0.960        | 0.308        | 0.341        | 0.890     | 0.591      |
| SI117      | 1.048     | 0.911     | 1.283        | 0.436        | 0.475        | 0.904     | 0.674      |
| SI118      | 0.714     | 0.878     | 0.497        | 0.431        | 0.517        | 0.824     | 0.902      |
| SI119      | 0.875     | 0.723     | 0.584        | 0.702        | 0.800        | 0.866     | 1.083      |
| SI120      | 0.899     | 0.902     | 0.746        | 0.288        | 0.330        | 0.861     | 1.061      |
| SI122      | 1.094     | 0.726     | 1.168        | 0.651        | 0.755        | 0.853     | 1.123      |
| SI123      | 1.174     | 0.669     | 1.182        | 0.548        | 0.687        | 0.790     | 0.929      |
| SI124      | 1.142     | 0.806     | 1.071        | 0.334        | 0.361        | 0.926     | 0.509      |
| SI125      | 0.964     | 0.771     | 0.739        | 0.699        | 0.809        | 0.856     | 0.892      |
| SI126      | 0.902     | 1.023     | 1.421        | 0.660        | 0.751        | 0.868     | 0.833      |
| SI127      | 1.110     | 0.820     | 0.999        | 0.837        | 0.968        | 0.851     | 1.030      |
| SI128      | 0.662     | 0.704     | 1.213        | 0.920        | 1.014        | 0.894     | 0.897      |
| SI129      | 0.762     | 0.936     | 0.911        | 1.010        | 1.189        | 0.838     | 1.077      |
| SI130      | 0.996     | 0.908     | 1.106        | 1.482        | 1.667        | 0.876     | 0.914      |
| SI131      | 0.824     | 1.136     | 1.361        | 1.230        | 1.486        | 0.816     | 0.827      |
| SI132      | 0.722     | 0.997     | 1.471        | 0.446        | 0.565        | 0.778     | 0.819      |
| SI133      | 0.849     | 0.887     | 1.278        | 0.492        | 0.563        | 0.863     | 0.542      |
| SI134      | 0.971     | 0.935     | 1.383        | 0.760        | 0.790        | 0.959     | 0.721      |
| SI135      | 0.726     | 0.868     | 1.441        | 0.543        | 0.660        | 0.811     | 0.842      |
| SI136      | 0.703     | 1.102     | 0.798        | 0.717        | 0.869        | 0.814     | 0.901      |
| SI137      | 0.837     | 0.838     | 1.057        | 0.774        | 0.875        | 0.874     | 0.721      |
| SI138      | 0.855     | 0.961     | 1.124        | 0.927        | 1.156        | 0.797     | 1.016      |
| SI139      | 0.892     | 1.095     | 0.756        | 0.462        | 0.579        | 0.788     | 1.081      |
| SI140      | 0.760     | 0.865     | 1.190        | 1.096        | 1.498        | 0.723     | 0.953      |
| SI142      | 0.994     | 0.761     | 0.471        | 0.515        | 0.612        | 0.837     | 1.073      |
| SI143      | 1.043     | 0.956     | 0.801        | 0.399        | 0.404        | 0.976     | 0.683      |
| SI144      | 0.739     | 1.059     | 1.051        | 0.749        | 0.792        | 0.936     | 1.086      |
| SI145      | 0.961     | 0.950     | 0.816        | 0.542        | 0.598        | 0.892     | 0.857      |
| SI146      | 0.984     | 1.019     | 1.277        | 0.921        | 0.980        | 0.927     | 0.775      |
| SI147      | 1.089     | 0.905     | 0.742        | 0.588        | 0.674        | 0.862     | 0.784      |
| SI148      | 0.932     | 0.920     | 0.768        | 0.775        | 0.854        | 0.901     | 1.165      |
| SI149      | 0.928     | 0.893     | 1.050        | 0.624        | 0.663        | 0.934     | 0.969      |
| SI150      | 0.989     | 0.662     | 0.719        | 0.741        | 0.784        | 0.931     | 0.892      |
| SI151      | 0.908     | 0.719     | 0.702        | 0.555        | 0.610        | 0.897     | 0.874      |
| SI152      | 0.879     | 0.782     | 1.267        | 0.549        | 0.642        | 0.849     | 0.746      |

Table S3. Continued.

| <b>DHL</b> | <b>HD</b> | <b>PH</b> | <b>NSPLM</b> | <b>GWPLM</b> | <b>BWPLM</b> | <b>HI</b> | <b>TGW</b> |
|------------|-----------|-----------|--------------|--------------|--------------|-----------|------------|
| SI153      | 0.733     | 0.722     | 1.010        | 0.333        | 0.396        | 0.828     | 0.572      |
| SI154      | 0.899     | 0.770     | 1.268        | 0.735        | 0.848        | 0.858     | 0.523      |
| SI155      | 1.008     | 0.801     | 0.613        | 0.336        | 0.404        | 0.818     | 0.663      |
| SI156      | 1.111     | 0.840     | 0.542        | 0.321        | 0.327        | 0.962     | 0.819      |
| SI157      | 0.791     | 0.708     | 1.062        | 1.166        | 1.176        | 0.980     | 0.531      |
| SI158      | 0.821     | 1.054     | 1.439        | 0.433        | 0.509        | 0.843     | 0.397      |
| SI159      | 0.643     | 0.673     | 1.885        | 0.841        | 0.946        | 0.883     | 0.560      |
| SI160      | 0.922     | 0.562     | 0.627        | 0.484        | 0.527        | 0.912     | 0.741      |
| SI161      | 0.900     | 0.570     | 0.830        | 0.552        | 0.606        | 0.907     | 1.043      |
| SI162      | 0.732     | 0.683     | 0.557        | 0.446        | 0.476        | 0.924     | 0.623      |
| SI163      | 0.984     | 0.607     | 0.458        | 0.179        | 0.201        | 0.880     | 1.128      |
| SI164      | 0.705     | 0.630     | 0.972        | 0.819        | 0.872        | 0.924     | 1.174      |
| SI166      | 0.730     | 0.738     | 0.858        | 0.478        | 0.508        | 0.930     | 0.726      |
| SI167      | 0.655     | 0.890     | 1.102        | 0.301        | 0.296        | 1.004     | 0.519      |
| SI168      | 0.811     | 0.984     | 0.652        | 0.607        | 0.674        | 0.895     | 0.650      |
| SI169      | 0.706     | 0.832     | 0.422        | 0.297        | 0.297        | 0.988     | 0.982      |
| SI170      | 0.848     | 0.560     | 0.794        | 0.476        | 0.516        | 0.908     | 0.535      |
| SI171      | 1.089     | 0.930     | 0.522        | 0.795        | 0.911        | 0.862     | 0.795      |
| SI172      | 0.958     | 0.825     | 1.140        | 0.299        | 0.341        | 0.866     | 0.984      |
| SI173      | 1.057     | 1.050     | 0.523        | 0.552        | 0.633        | 0.861     | 0.964      |
| SI174      | 0.985     | 1.042     | 0.792        | 0.435        | 0.418        | 1.026     | 0.525      |
| SI175      | 1.112     | 1.036     | 0.984        | 0.454        | 0.445        | 1.005     | 0.482      |
| SI176      | 0.809     | 0.681     | 0.473        | 0.113        | 0.123        | 0.908     | 0.713      |
| SI177      | 0.698     | 0.860     | 0.932        | 0.583        | 0.639        | 0.905     | 1.003      |
| SI178      | 0.957     | 0.792     | 1.637        | 1.038        | 1.043        | 0.992     | 1.160      |
| SI179      | 1.072     | 0.914     | 1.122        | 1.030        | 1.055        | 0.973     | 0.723      |
| SI180      | 1.179     | 0.651     | 0.267        | 0.125        | 0.139        | 0.893     | 1.012      |
| SI181      | 1.100     | 0.553     | 0.492        | 0.322        | 0.342        | 0.930     | 1.087      |
| SI182      | 1.122     | 1.033     | 0.429        | 0.250        | 0.263        | 0.934     | 0.437      |
| SI183      | 1.125     | 0.567     | 0.510        | 0.122        | 0.121        | 0.987     | 0.897      |
| SI184      | 1.073     | 0.432     | 0.498        | 0.183        | 0.181        | 0.990     | 1.010      |
| SI185      | 0.989     | 0.737     | 0.569        | 0.126        | 0.141        | 0.883     | 1.149      |
| SI186      | 1.043     | 0.997     | 0.540        | 0.120        | 0.128        | 0.927     | 0.517      |
| SI188      | 1.085     | 0.799     | 0.511        | 0.150        | 0.164        | 0.902     | 0.668      |
| SI189      | 1.162     | 0.700     | 0.595        | 0.401        | 0.414        | 0.955     | 0.752      |
| SI190      | 0.928     | 0.652     | 0.422        | 0.089        | 0.090        | 0.966     | 0.740      |
| SI191      | 1.088     | 0.726     | 0.458        | 0.333        | 0.362        | 0.907     | 0.630      |
| SI192      | 1.031     | 0.725     | 0.576        | 0.507        | 0.577        | 0.862     | 0.966      |
| SI194      | 1.042     | 0.685     | 0.868        | 0.851        | 0.888        | 0.945     | 0.683      |
| SI195      | 1.103     | 0.669     | 1.466        | 0.515        | 0.581        | 0.872     | 0.590      |
| SI196      | 0.789     | 0.661     | 0.738        | 0.352        | 0.381        | 0.911     | 0.631      |
| SI197      | 0.856     | 0.604     | 0.716        | 0.498        | 0.531        | 0.926     | 1.071      |
| SI198      | 1.124     | 0.620     | 0.471        | 0.144        | 0.155        | 0.922     | 0.880      |
| SI199      | 1.040     | 0.593     | 0.557        | 0.391        | 0.469        | 0.834     | 0.779      |
| SI200      | 1.154     | 0.766     | 0.526        | 0.142        | 0.163        | 0.867     | 0.639      |
| SI201      | 0.864     | 0.621     | 1.877        | 0.445        | 0.497        | 0.898     | 0.501      |
| SI202      | 0.854     | 0.688     | 1.079        | 0.266        | 0.263        | 1.001     | 0.509      |
| SI203      | 1.131     | 0.627     | 0.617        | 0.098        | 0.105        | 0.929     | 0.622      |

Table S3. Continued.

| DHL   | HD    | PH    | NSPLM | GWPLM | BWPLM | HI    | TGW   |
|-------|-------|-------|-------|-------|-------|-------|-------|
| SI204 | 0.875 | 0.671 | 0.594 | 0.182 | 0.186 | 0.967 | 0.602 |
| SI205 | 1.135 | 0.608 | 0.489 | 0.084 | 0.093 | 0.895 | 0.553 |
| SI206 | 1.163 | 0.541 | 0.436 | 0.076 | 0.082 | 0.915 | 0.438 |
| SI208 | 0.919 | 0.815 | 0.674 | 0.688 | 0.719 | 0.942 | 0.635 |
| SI209 | 1.049 | 0.628 | 0.399 | 0.051 | 0.048 | 1.057 | 0.517 |
| SI210 | 1.111 | 0.550 | 0.478 | 0.149 | 0.152 | 0.973 | 0.521 |
| SI211 | 1.125 | 0.621 | 0.408 | 0.203 | 0.217 | 0.924 | 0.462 |
| SI212 | 1.199 | 0.630 | 0.405 | 0.111 | 0.113 | 0.962 | 0.612 |
| SI213 | 1.160 | 0.666 | 0.476 | 0.162 | 0.170 | 0.941 | 0.962 |
| SI214 | 1.074 | 1.153 | 0.261 | 0.228 | 0.218 | 1.038 | 0.694 |
| SI215 | 0.914 | 0.844 | 0.569 | 0.655 | 0.688 | 0.949 | 0.990 |
| SI216 | 0.930 | 0.619 | 0.591 | 0.351 | 0.408 | 0.856 | 0.607 |
| SI217 | 0.948 | 0.653 | 0.325 | 0.267 | 0.342 | 0.775 | 1.070 |
| SI218 | 0.858 | 0.872 | 1.055 | 0.937 | 1.019 | 0.908 | 1.136 |
| SI219 | 0.730 | 0.718 | 0.753 | 0.612 | 0.714 | 0.856 | 0.711 |
| SI220 | 0.800 | 0.990 | 0.517 | 0.473 | 0.516 | 0.914 | 0.710 |
| SI221 | 0.753 | 0.760 | 0.825 | 0.629 | 0.746 | 0.833 | 0.995 |
| SI222 | 0.882 | 0.638 | 0.687 | 0.329 | 0.362 | 0.898 | 0.570 |
| SI223 | 0.744 | 1.179 | 0.891 | 0.658 | 0.743 | 0.874 | 0.679 |
| SI224 | 1.033 | 1.167 | 0.971 | 0.715 | 0.856 | 0.825 | 0.709 |
| SI225 | 0.695 | 0.984 | 0.917 | 0.673 | 0.722 | 0.934 | 0.581 |
| SI226 | 1.091 | 1.054 | 0.407 | 0.129 | 0.127 | 1.013 | 0.485 |
| SI227 | 1.060 | 0.855 | 0.354 | 0.158 | 0.180 | 0.874 | 0.718 |
| SI229 | 0.810 | 0.962 | 0.711 | 0.456 | 0.495 | 0.908 | 0.888 |
| SI230 | 0.802 | 0.879 | 0.692 | 0.369 | 0.380 | 0.965 | 0.457 |
| SI231 | 0.926 | 0.890 | 0.561 | 0.307 | 0.340 | 0.891 | 0.655 |
| SI232 | 0.789 | 0.922 | 0.881 | 0.913 | 1.035 | 0.870 | 0.644 |
| SI233 | 0.592 | 0.915 | 0.487 | 0.248 | 0.273 | 0.902 | 0.855 |
| SI234 | 0.853 | 0.950 | 1.126 | 0.341 | 0.384 | 0.878 | 0.731 |
| SI235 | 0.853 | 0.973 | 1.076 | 0.938 | 1.163 | 0.808 | 0.927 |
| SI236 | 0.623 | 1.240 | 1.545 | 0.671 | 0.755 | 0.879 | 0.781 |
| SI237 | 1.013 | 0.905 | 0.419 | 0.162 | 0.178 | 0.905 | 0.689 |
| SI238 | 0.863 | 0.856 | 0.847 | 0.765 | 0.880 | 0.865 | 0.958 |
| SI239 | 0.726 | 0.984 | 0.742 | 0.906 | 1.066 | 0.838 | 0.878 |
| SI240 | 0.859 | 0.950 | 0.995 | 0.359 | 0.423 | 0.838 | 0.991 |
| SI241 | 0.798 | 0.808 | 1.082 | 0.997 | 1.216 | 0.813 | 0.816 |
| SI242 | 0.772 | 0.855 | 1.237 | 1.578 | 1.796 | 0.872 | 0.445 |
| SI243 | 0.858 | 0.870 | 1.026 | 0.245 | 0.275 | 0.888 | 0.663 |
| SI244 | 0.830 | 0.866 | 0.291 | 0.125 | 0.136 | 0.913 | 0.656 |
| SI245 | 1.098 | 1.204 | 0.571 | 0.115 | 0.138 | 0.828 | 0.527 |
| SI246 | 0.993 | 1.233 | 0.695 | 0.669 | 0.767 | 0.864 | 1.072 |
| SI250 | 1.003 | 0.933 | 0.881 | 0.441 | 0.503 | 0.867 | 1.071 |
| SI251 | 0.947 | 0.855 | 0.943 | 0.413 | 0.499 | 0.820 | 0.902 |
| SI252 | 0.976 | 0.882 | 0.952 | 0.461 | 0.579 | 0.791 | 1.194 |
| SI253 | 0.968 | 0.930 | 1.618 | 0.580 | 0.631 | 0.920 | 1.049 |
| SI256 | 1.026 | 0.914 | 1.222 | 0.562 | 0.654 | 0.856 | 0.841 |
| SI257 | 0.750 | 0.877 | 0.642 | 0.396 | 0.449 | 0.871 | 0.733 |
| SI258 | 1.126 | 0.775 | 0.960 | 0.459 | 0.546 | 0.832 | 0.875 |

Table S3. Continued.

| DHL   | HD    | PH    | NSPLM | GWPLM | BWPLM | HI    | TGW   |
|-------|-------|-------|-------|-------|-------|-------|-------|
| SI259 | 0.969 | 0.680 | 0.379 | 0.278 | 0.309 | 0.891 | 0.549 |
| SI260 | 0.670 | 0.803 | 1.212 | 0.605 | 0.715 | 0.835 | 0.863 |
| SI261 | 0.932 | 0.769 | 0.426 | 0.102 | 0.117 | 0.863 | 0.706 |
| SI262 | 0.713 | 0.772 | 0.745 | 0.440 | 0.541 | 0.804 | 0.973 |
| SI264 | 0.813 | 0.958 | 0.776 | 0.489 | 0.603 | 0.803 | 0.882 |
| SI265 | 0.726 | 1.143 | 0.903 | 0.329 | 0.381 | 0.856 | 1.016 |
| SI266 | 0.870 | 1.089 | 0.453 | 0.296 | 0.321 | 0.922 | 0.835 |
| SI268 | 0.980 | 1.131 | 0.458 | 0.250 | 0.318 | 0.783 | 0.723 |
| SI269 | 1.014 | 1.215 | 0.476 | 0.153 | 0.179 | 0.843 | 0.723 |
| SI270 | 0.717 | 1.094 | 1.015 | 1.133 | 1.306 | 0.857 | 1.021 |
| SI272 | 0.891 | 0.860 | 0.827 | 0.304 | 0.373 | 0.811 | 0.683 |
| SI273 | 0.901 | 0.923 | 0.573 | 0.482 | 0.616 | 0.775 | 0.741 |
| SI274 | 0.952 | 0.931 | 0.359 | 0.327 | 0.467 | 0.693 | 1.111 |
| SI276 | 0.854 | 1.057 | 0.726 | 0.346 | 0.419 | 0.826 | 0.975 |
| SI277 | 0.902 | 0.527 | 0.767 | 0.355 | 0.382 | 0.919 | 0.822 |
| SI279 | 1.114 | 0.657 | 0.462 | 0.247 | 0.271 | 0.908 | 0.733 |
| SI280 | 0.724 | 0.713 | 0.847 | 0.277 | 0.323 | 0.848 | 0.613 |
| SI281 | 0.684 | 0.826 | 0.852 | 0.314 | 0.340 | 0.916 | 0.946 |
| SI283 | 0.797 | 1.132 | 0.457 | 0.212 | 0.252 | 0.835 | 0.821 |
| SI284 | 0.770 | 0.744 | 0.536 | 0.154 | 0.175 | 0.866 | 0.895 |
| SI285 | 0.677 | 1.312 | 0.790 | 0.401 | 0.414 | 0.956 | 0.927 |
| SI286 | 1.095 | 1.055 | 0.455 | 0.218 | 0.240 | 0.894 | 0.691 |
| SI287 | 0.732 | 0.897 | 0.595 | 0.326 | 0.370 | 0.870 | 0.726 |
| SI288 | 1.057 | 1.136 | 0.500 | 0.398 | 0.457 | 0.860 | 0.501 |
| SI289 | 1.045 | 0.798 | 0.888 | 0.464 | 0.571 | 0.799 | 0.607 |
| SI290 | 0.993 | 1.382 | 0.837 | 0.660 | 0.833 | 0.783 | 0.570 |
| SI291 | 1.125 | 1.089 | 0.582 | 0.262 | 0.333 | 0.776 | 0.640 |
| SI292 | 1.154 | 0.996 | 0.746 | 0.342 | 0.385 | 0.875 | 0.699 |
| SI293 | 1.076 | 1.363 | 0.410 | 0.134 | 0.146 | 0.900 | 0.595 |
| SI295 | 0.610 | 1.460 | 0.987 | 0.490 | 0.593 | 0.817 | 0.733 |
| SI296 | 1.133 | 1.223 | 0.408 | 0.337 | 0.413 | 0.814 | 0.836 |
| SI297 | 1.171 | 1.487 | 0.725 | 0.346 | 0.405 | 0.842 | 0.778 |
| SI299 | 0.832 | 1.372 | 1.397 | 1.113 | 1.282 | 0.861 | 0.702 |
| SI300 | 1.050 | 1.008 | 0.551 | 0.304 | 0.343 | 0.881 | 0.643 |
| SI301 | 0.945 | 1.058 | 0.433 | 0.169 | 0.203 | 0.825 | 1.051 |
| SI302 | 0.919 | 1.427 | 0.715 | 0.692 | 0.777 | 0.877 | 0.721 |
| SI303 | 0.701 | 1.168 | 1.187 | 0.349 | 0.411 | 0.842 | 0.836 |
| SI305 | 0.891 | 1.165 | 0.493 | 0.501 | 0.522 | 0.945 | 0.960 |
| SI306 | 1.020 | 1.015 | 0.481 | 0.329 | 0.388 | 0.835 | 0.858 |
| SI307 | 0.803 | 0.968 | 0.992 | 0.790 | 0.845 | 0.919 | 0.960 |
| SI308 | 0.884 | 0.909 | 1.162 | 1.297 | 1.474 | 0.863 | 0.741 |
| SI309 | 0.820 | 1.326 | 0.926 | 0.983 | 1.211 | 0.800 | 0.817 |
| SI311 | 0.785 | 1.242 | 1.142 | 0.480 | 0.608 | 0.782 | 0.826 |
| SI312 | 0.828 | 0.908 | 0.982 | 0.864 | 1.134 | 0.755 | 0.734 |
| SI314 | 1.131 | 1.292 | 0.612 | 0.385 | 0.400 | 0.957 | 0.680 |
| SI316 | 1.108 | 1.313 | 0.725 | 0.410 | 0.445 | 0.913 | 0.710 |
| SI317 | 0.890 | 1.576 | 0.842 | 0.487 | 0.571 | 0.855 | 0.769 |
| SI319 | 1.211 | 0.939 | 0.537 | 0.175 | 0.213 | 0.817 | 0.864 |



Table S3. Continued.

| DHL   | HD    | PH    | NSPLM | GWPLM | BWPLM | HI    | TGW   |
|-------|-------|-------|-------|-------|-------|-------|-------|
| SI320 | 1.003 | 1.037 | 0.739 | 0.392 | 0.479 | 0.810 | 0.775 |
| SI321 | 0.912 | 1.072 | 0.882 | 0.435 | 0.512 | 0.841 | 0.650 |
| SI322 | 0.948 | 1.046 | 0.750 | 0.298 | 0.353 | 0.840 | 0.765 |
| SI323 | 0.996 | 0.978 | 0.567 | 0.183 | 0.204 | 0.883 | 1.030 |
| SI325 | 1.078 | 0.725 | 0.504 | 0.252 | 0.297 | 0.843 | 0.777 |
| SI327 | 0.933 | 1.068 | 0.796 | 0.321 | 0.384 | 0.826 | 0.725 |
| SI328 | 0.745 | 0.941 | 0.771 | 0.645 | 0.696 | 0.913 | 0.873 |
| SI329 | 1.170 | 0.822 | 0.481 | 0.279 | 0.340 | 0.811 | 0.879 |
| SI330 | 0.717 | 1.215 | 0.682 | 0.593 | 0.758 | 0.771 | 0.895 |
| SI331 | 0.808 | 0.826 | 0.619 | 0.371 | 0.407 | 0.899 | 0.798 |
| SI332 | 0.753 | 1.117 | 0.753 | 0.359 | 0.411 | 0.861 | 0.863 |
| SI333 | 0.760 | 1.038 | 0.779 | 0.236 | 0.268 | 0.865 | 0.653 |
| SI334 | 0.846 | 0.886 | 0.595 | 0.319 | 0.356 | 0.885 | 0.821 |
| SI335 | 0.866 | 0.939 | 0.612 | 0.325 | 0.383 | 0.841 | 0.819 |

HD is heading date (days), PH is plant height (cm), NSPLM is number of spikes per linear meter (spikes  $\text{lm}^{-1}$ ), GWPLM is grain weight per linear meter ( $\text{g lm}^{-1}$ ), BWPLM is biological weight per linear meter ( $\text{g lm}^{-1}$ ), HI is harvest index (%), and TGW is thousand grain weight (g).

**Table S4.** Correlation coefficients for all studied traits under salinity level 1 (above diagonal) and salinity level 2 (below diagonal) over growing seasons.

|       | <b>HD</b> | <b>PH</b> | <b>NSPLM</b> | <b>GWPLM</b> | <b>BWPLM</b> | <b>HI</b> | <b>TGW</b> |
|-------|-----------|-----------|--------------|--------------|--------------|-----------|------------|
| HD    |           | −0.092**  | −0.358**     | −0.360**     | −0.342**     | −0.026    | −0.198**   |
| PH    | −0.072**  |           | 0.109**      | 0.267**      | 0.258**      | −0.021    | 0.032      |
| NSPLM | −0.454**  | 0.051*    |              | 0.660**      | 0.645**      | −0.031    | −0.006     |
| GWPLM | −0.376**  | 0.247**   | 0.653**      |              | 0.971**      | −0.001    | 0.276**    |
| BWPLM | −0.368**  | 0.238**   | 0.651**      | 0.987**      |              | −0.229**  | 0.270**    |
| HI    | 0.010     | 0.021     | −0.071**     | −0.037       | −0.187**     |           | −0.009     |
| TGW   | −0.155**  | 0.206**   | 0.030        | 0.274**      | 0.268**      | −0.001    |            |

HD is heading date (days), PH is plant height (cm), NSPLM is number of spikes per linear meter (spikes  $\text{lm}^{-1}$ ), GWPLM is grain weight per linear meter ( $\text{g lm}^{-1}$ ), BWPLM is biological weight per linear meter ( $\text{g lm}^{-1}$ ), HI is harvest index (%), and TGW is thousand grain weight (g). \*\* highly significant at 0.01 level.

**Table S5.** Examples of detected QTL for heading date (HD) and grain weight/lm (GWPLM) showing doubled haploid lines (DHLs) which carrying the elite and exotic alleles.

| <b>Heading date (HD)</b> |        |            |        | <b>Grain weight per linear meter (GWPLM)</b> |        |                  |        |
|--------------------------|--------|------------|--------|----------------------------------------------|--------|------------------|--------|
| qDHHD.3H (bPb-0361,      |        | qDHHD.4H.a |        | qGWYPLM.4H (bPb-                             |        | qGWYPLM.7H (bPb- |        |
| Elite                    | Exotic | Elite      | Exotic | Elite                                        | Exotic | Elite            | Exotic |

| Ave | 73. | Ave | 72. | Ave | 72. | Ave | 75. | Ave | 240 | Ave | 200 | Ave | 229 | Ave | 277 |
|-----|-----|-----|-----|-----|-----|-----|-----|-----|-----|-----|-----|-----|-----|-----|-----|
| SI2 | 58. | SI0 | 61. | SI0 | 61. | SI0 | 74. | SI0 | 372 | SI0 | 150 | SI0 | 263 | SI0 | 372 |
| SI2 | 59. | SI0 | 63. | SI0 | 71. | SI0 | 75. | SI0 | 263 | SI0 | 190 | SI0 | 297 | SI0 | 325 |
| SI1 | 61. | SI0 | 63. | SI0 | 71. | SI0 | 68. | SI0 | 297 | SI0 | 264 | SI0 | 433 | SI0 | 357 |
| SI2 | 61. | SI0 | 63. | SI0 | 69. | SI0 | 71. | SI0 | 325 | SI0 | 246 | SI0 | 244 | SI0 | 293 |
| SI0 | 61. | SI2 | 64. | SI0 | 66. | SI0 | 74. | SI0 | 433 | SI0 | 195 | SI0 | 253 | SI0 | 338 |
| SI0 | 61. | SI0 | 64. | SI0 | 64. | SI0 | 65. | SI0 | 244 | SI0 | 182 | SI0 | 193 | SI0 | 229 |
| SI1 | 62. | SI0 | 65. | SI0 | 67. | SI0 | 83. | SI0 | 253 | SI0 | 280 | SI0 | 242 | SI0 | 312 |
| SI1 | 62. | SI1 | 65. | SI0 | 76. | SI0 | 74. | SI0 | 193 | SI0 | 225 | SI0 | 337 | SI0 | 233 |
| SI2 | 62. | SI0 | 66. | SI0 | 68. | SI0 | 63. | SI0 | 357 | SI0 | 245 | SI0 | 223 | SI0 | 440 |
| SI2 | 62. | SI0 | 67. | SI0 | 65. | SI0 | 68. | SI0 | 242 | SI0 | 225 | SI0 | 162 | SI0 | 295 |
| SI0 | 63. | SI1 | 67. | SI0 | 65. | SI0 | 80. | SI0 | 337 | SI0 | 248 | SI0 | 193 | SI0 | 502 |
| SI2 | 63. | SI0 | 68. | SI0 | 71. | SI0 | 76. | SI0 | 223 | SI0 | 147 | SI0 | 339 | SI0 | 243 |
| SI1 | 64. | SI0 | 69. | SI0 | 74. | SI0 | 76. | SI0 | 162 | SI0 | 201 | SI0 | 289 | SI0 | 280 |
| SI1 | 64. | SI1 | 70. | SI0 | 61. | SI0 | 77. | SI0 | 193 | SI0 | 95. | SI0 | 234 | SI0 | 239 |
| SI2 | 64. | SI0 | 71. | SI0 | 75. | SI0 | 70. | SI0 | 339 | SI1 | 198 | SI0 | 280 | SI0 | 226 |
| SI1 | 64. | SI0 | 71. | SI0 | 64. | SI0 | 76. | SI0 | 289 | SI1 | 293 | SI0 | 264 | SI0 | 265 |
| SI2 | 64. | SI0 | 71. | SI0 | 66. | SI1 | 72. | SI0 | 234 | SI1 | 217 | SI0 | 289 | SI2 | 200 |
| SI1 | 64. | SI0 | 72. | SI0 | 63. | SI1 | 70. | SI0 | 280 | SI1 | 176 | SI0 | 373 | SI2 | 272 |
| SI1 | 64. | SI2 | 72. | SI0 | 75. | SI1 | 81. | SI0 | 293 | SI1 | 258 | SI0 | 255 | SI2 | 196 |
| SI2 | 64. | SI0 | 74. | SI0 | 74. | SI1 | 76. | SI0 | 338 | SI1 | 190 | SI0 | 410 | SI2 | 166 |
| SI0 | 64. | SI0 | 74. | SI0 | 84. | SI1 | 78. | SI0 | 264 | SI1 | 162 | SI0 | 231 | SI2 | 337 |
| SI0 | 65. | SI0 | 74. | SI0 | 67. | SI1 | 79. | SI0 | 229 | SI1 | 116 | SI0 | 271 | SI2 | 340 |
| SI1 | 65. | SI0 | 74. | SI0 | 75. | SI1 | 81. | SI0 | 312 | SI1 | 146 | SI0 | 415 | SI2 | 118 |
| SI2 | 65. | SI2 | 74. | SI0 | 73. | SI1 | 83. | SI0 | 289 | SI1 | 116 | SI0 | 133 | SI2 | 260 |
| SI2 | 65. | SI0 | 74. | SI0 | 74. | SI1 | 78. | SI0 | 233 | SI1 | 198 | SI0 | 347 | SI2 | 258 |
| SI1 | 65. | SI0 | 75. | SI0 | 63. | SI1 | 72. | SI0 | 440 | SI2 | 145 | SI0 | 267 | SI2 | 111 |
| SI1 | 65. | SI0 | 75. | SI0 | 61. | SI1 | 79. | SI0 | 255 | SI2 | 94. | SI0 | 282 |     |     |
| SI0 | 66. | SI0 | 75. | SI0 | 76. | SI1 | 62. | SI0 | 295 | SI2 | 91. | SI0 | 255 |     |     |
| SI2 | 66. | SI0 | 75. | SI0 | 71. | SI1 | 76. | SI0 | 410 | SI2 | 73. | SI0 | 338 |     |     |
| SI1 | 66. | SI2 | 76. | SI0 | 76. | SI1 | 64. | SI0 | 231 | SI2 | 126 | SI0 | 522 |     |     |
| SI2 | 66. | SI0 | 76. | SI0 | 74. | SI1 | 78. | SI0 | 271 | SI2 | 144 | SI0 | 312 |     |     |
| SI0 | 67. | SI0 | 76. | SI0 | 72. | SI1 | 75. | SI0 | 415 | SI2 | 145 | SI0 | 379 |     |     |
| SI2 | 67. | SI1 | 79. | SI0 | 63. | SI1 | 71. | SI0 | 133 | SI2 | 186 | SI0 | 243 |     |     |
| SI2 | 67. | SI1 | 79. | SI0 | 80. | SI1 | 65. | SI0 | 347 | SI2 | 170 | SI0 | 309 |     |     |
| SI0 | 67. | SI1 | 80. | SI0 | 71. | SI1 | 72. | SI0 | 267 | SI2 | 338 | SI0 | 313 |     |     |
| SI2 | 67. | SI1 | 80. | SI0 | 78. | SI1 | 76. | SI0 | 282 | SI2 | 241 | SI0 | 174 |     |     |
| SI2 | 67. | SI2 | 81. | SI0 | 75. | SI1 | 80. | SI0 | 255 | SI2 | 200 | SI0 | 200 |     |     |
| SI2 | 67. | SI0 | 83. | SI0 | 74. | SI1 | 67. | SI0 | 338 | SI2 | 272 | SI0 | 211 |     |     |
| SI1 | 67. |     |     | SI0 | 70. | SI1 | 69. | SI0 | 522 | SI2 | 212 | SI0 | 211 |     |     |
| SI0 | 68. |     |     | SI0 | 77. | SI1 | 65. | SI0 | 502 | SI2 | 196 | SI0 | 150 |     |     |
| SI0 | 68. |     |     | SI0 | 71. | SI1 | 64. | SI0 | 312 | SI2 | 324 | SI0 | 190 |     |     |
| SI0 | 68. |     |     | SI0 | 75. | SI1 | 80. | SI0 | 379 | SI2 | 166 | SI0 | 209 |     |     |
| SI1 | 68. |     |     | SI0 | 73. | SI1 | 81. | SI0 | 243 | SI2 | 302 | SI0 | 261 |     |     |
| SI1 | 69. |     |     | SI0 | 71. | SI1 | 79. | SI0 | 309 | SI2 | 118 | SI0 | 290 |     |     |

Table S5. Continued.

| Heading date (HD)   |        |            |        | Grain weight per linear meter (GWPLM) |        |                  |        |
|---------------------|--------|------------|--------|---------------------------------------|--------|------------------|--------|
| qDHHD.3H (bPb-0361, |        | qDHHD.4H.a |        | qGWYPLM.4H (bPb-                      |        | qGWYPLM.7H (bPb- |        |
| Elite               | Exotic | Elite      | Exotic | Elite                                 | Exotic | Elite            | Exotic |

| Ave | 73. | Ave | 72. | Ave | 72. | Ave | 75. | Ave | 240 | Ave | 200 | Ave | 229 | Ave | 277 |
|-----|-----|-----|-----|-----|-----|-----|-----|-----|-----|-----|-----|-----|-----|-----|-----|
| SI2 | 69. |     |     | SI0 | 73. | SI1 | 79. | SI0 | 243 | SI2 | 254 | SI0 | 180 |     |     |
| SI1 | 69. |     |     | SI0 | 74. | SI1 | 82. | SI0 | 174 | SI2 | 260 | SI0 | 264 |     |     |
| SI1 | 69. |     |     | SI0 | 76. | SI1 | 73. | SI0 | 200 | SI2 | 226 | SI0 | 246 |     |     |
| SI2 | 69. |     |     | SI0 | 74. | SI1 | 79. | SI0 | 211 | SI2 | 233 | SI0 | 195 |     |     |
| SI2 | 69. |     |     | SI0 | 78. | SI1 | 77. | SI0 | 211 | SI2 | 182 | SI0 | 234 |     |     |
| SI2 | 69. |     |     | SI0 | 74. | SI2 | 70. | SI0 | 209 | SI2 | 258 | SI0 | 134 |     |     |
| SI2 | 69. |     |     | SI0 | 77. | SI2 | 80. | SI0 | 261 | SI2 | 111 | SI0 | 182 |     |     |
| SI1 | 70. |     |     | SI0 | 75. | SI2 | 81. | SI0 | 290 | SI2 | 369 | SI0 | 197 |     |     |
| SI2 | 70. |     |     | SI0 | 75. | SI2 | 72. | SI0 | 234 | SI2 | 183 | SI0 | 225 |     |     |
| SI2 | 70. |     |     | SI0 | 74. | SI2 | 77. | SI0 | 197 | SI2 | 205 | SI0 | 223 |     |     |
| SI2 | 70. |     |     | SI0 | 76. | SI2 | 79. | SI0 | 223 | SI2 | 161 | SI0 | 189 |     |     |
| SI2 | 70. |     |     | SI0 | 79. | SI2 | 82. | SI0 | 189 | SI2 | 241 | SI0 | 267 |     |     |
| SI1 | 70. |     |     | SI0 | 80. | SI2 | 77. | SI0 | 261 | SI3 | 147 | SI0 | 261 |     |     |
| SI2 | 70. |     |     | SI0 | 80. | SI2 | 75. | SI0 | 216 | SI3 | 192 | SI0 | 216 |     |     |
| SI2 | 70. |     |     | SI0 | 76. | SI2 | 80. | SI0 | 239 | SI3 | 260 | SI0 | 245 |     |     |
| SI1 | 70. |     |     | SI0 | 73. | SI2 | 77. | SI0 | 226 |     |     | SI0 | 225 |     |     |
| SI1 | 70. |     |     | SI0 | 77. |     |     | SI0 | 265 |     |     | SI0 | 248 |     |     |
| SI1 | 70. |     |     | SI0 | 68. |     |     | SI0 | 157 |     |     | SI0 | 147 |     |     |
| SI2 | 70. |     |     | SI0 | 80. |     |     | SI0 | 198 |     |     | SI0 | 201 |     |     |
| SI0 | 70. |     |     | SI0 | 74. |     |     | SI0 | 177 |     |     | SI0 | 95. |     |     |
| SI0 | 70. |     |     | SI0 | 67. |     |     | SI0 | 154 |     |     | SI0 | 157 |     |     |
| SI0 | 70. |     |     | SI0 | 77. |     |     | SI0 | 137 |     |     | SI0 | 198 |     |     |
| SI0 | 71. |     |     | SI0 | 74. |     |     | SI0 | 254 |     |     | SI0 | 177 |     |     |
| SI0 | 71. |     |     | SI0 | 71. |     |     | SI0 | 171 |     |     | SI0 | 154 |     |     |
| SI0 | 71. |     |     | SI1 | 73. |     |     | SI0 | 172 |     |     | SI0 | 137 |     |     |
| SI1 | 71. |     |     | SI1 | 74. |     |     | SI0 | 197 |     |     | SI0 | 254 |     |     |
| SI0 | 71. |     |     | SI1 | 70. |     |     | SI0 | 149 |     |     | SI0 | 171 |     |     |
| SI0 | 71. |     |     | SI1 | 76. |     |     | SI0 | 212 |     |     | SI0 | 172 |     |     |
| SI1 | 71. |     |     | SI1 | 75. |     |     | SI0 | 216 |     |     | SI0 | 239 |     |     |
| SI2 | 71. |     |     | SI1 | 80. |     |     | SI0 | 130 |     |     | SI0 | 197 |     |     |
| SI2 | 71. |     |     | SI1 | 64. |     |     | SI1 | 143 |     |     | SI0 | 149 |     |     |
| SI2 | 71. |     |     | SI1 | 71. |     |     | SI1 | 178 |     |     | SI0 | 212 |     |     |
| SI1 | 72. |     |     | SI1 | 82. |     |     | SI1 | 157 |     |     | SI0 | 216 |     |     |
| SI2 | 72. |     |     | SI1 | 81. |     |     | SI1 | 304 |     |     | SI0 | 130 |     |     |
| SI1 | 72. |     |     | SI1 | 74. |     |     | SI1 | 256 |     |     | SI1 | 153 |     |     |
| SI1 | 72. |     |     | SI1 | 72. |     |     | SI1 | 195 |     |     | SI1 | 189 |     |     |
| SI1 | 72. |     |     | SI1 | 80. |     |     | SI1 | 207 |     |     | SI1 | 143 |     |     |
| SI1 | 72. |     |     | SI1 | 66. |     |     | SI1 | 216 |     |     | SI1 | 178 |     |     |
| SI1 | 72. |     |     | SI1 | 69. |     |     | SI1 | 212 |     |     | SI1 | 157 |     |     |
| SI1 | 72. |     |     | SI1 | 70. |     |     | SI1 | 232 |     |     | SI1 | 304 |     |     |
| SI2 | 72. |     |     | SI1 | 75. |     |     | SI1 | 259 |     |     | SI1 | 256 |     |     |
| SI1 | 72. |     |     | SI1 | 64. |     |     | SI1 | 246 |     |     | SI1 | 195 |     |     |
| SI2 | 73. |     |     | SI1 | 69. |     |     | SI1 | 198 |     |     | SI1 | 207 |     |     |
| SI0 | 73. |     |     | SI1 | 70. |     |     | SI1 | 233 |     |     | SI1 | 216 |     |     |
| SI1 | 73. |     |     | SI1 | 72. |     |     | SI1 | 302 |     |     | SI1 | 212 |     |     |

Table S5. Continued.

| Heading date (HD)   |            | Grain weight per linear meter (GWPLM) |                  |
|---------------------|------------|---------------------------------------|------------------|
| qDHHD.3H (bPb-0361, | qDHHD.4H.a | qGWYPLM.4H (bPb-                      | qGWYPLM.7H (bPb- |

| Elite |     | Exotic |     | Elite |     | Exotic |     | Elite |     | Exotic |     | Elite |     | Exotic |    |
|-------|-----|--------|-----|-------|-----|--------|-----|-------|-----|--------|-----|-------|-----|--------|----|
| Ave   | 73. | Ave    | 72. | Ave   | 72. | Ave    | 75. | Ave   | 240 | Ave    | 200 | Ave   | 229 | Ave    | 27 |
| SI1   | 73. |        |     | SI1   | 66. |        |     | SI1   | 269 |        |     | SI1   | 232 |        |    |
| SI1   | 73. |        |     | SI1   | 76. |        |     | SI1   | 274 |        |     | SI1   | 259 |        |    |
| SI0   | 73. |        |     | SI1   | 65. |        |     | SI1   | 286 |        |     | SI1   | 246 |        |    |
| SI0   | 73. |        |     | SI1   | 79. |        |     | SI1   | 283 |        |     | SI1   | 198 |        |    |
| SI2   | 73. |        |     | SI1   | 73. |        |     | SI1   | 315 |        |     | SI1   | 233 |        |    |
| SI1   | 73. |        |     | SI1   | 73. |        |     | SI1   | 324 |        |     | SI1   | 222 |        |    |
| SI2   | 73. |        |     | SI1   | 72. |        |     | SI1   | 333 |        |     | SI1   | 302 |        |    |
| SI0   | 73. |        |     | SI1   | 61. |        |     | SI1   | 224 |        |     | SI1   | 185 |        |    |
| SI0   | 73. |        |     | SI1   | 72. |        |     | SI1   | 235 |        |     | SI1   | 269 |        |    |
| SI0   | 74. |        |     | SI1   | 75. |        |     | SI1   | 291 |        |     | SI1   | 274 |        |    |
| SI0   | 74. |        |     | SI1   | 62. |        |     | SI1   | 238 |        |     | SI1   | 198 |        |    |
| SI2   | 74. |        |     | SI1   | 69. |        |     | SI1   | 291 |        |     | SI1   | 286 |        |    |
| SI0   | 74. |        |     | SI1   | 64. |        |     | SI1   | 300 |        |     | SI1   | 283 |        |    |
| SI0   | 74. |        |     | SI1   | 70. |        |     | SI1   | 349 |        |     | SI1   | 315 |        |    |
| SI0   | 74. |        |     | SI1   | 80. |        |     | SI1   | 218 |        |     | SI1   | 324 |        |    |
| SI2   | 74. |        |     | SI1   | 75. |        |     | SI1   | 348 |        |     | SI1   | 333 |        |    |
| SI2   | 74. |        |     | SI1   | 78. |        |     | SI1   | 232 |        |     | SI1   | 433 |        |    |
| SI0   | 74. |        |     | SI1   | 76. |        |     | SI1   | 306 |        |     | SI1   | 391 |        |    |
| SI0   | 74. |        |     | SI1   | 80. |        |     | SI1   | 244 |        |     | SI1   | 224 |        |    |
| SI1   | 74. |        |     | SI1   | 68. |        |     | SI1   | 315 |        |     | SI1   | 235 |        |    |
| SI0   | 74. |        |     | SI1   | 64. |        |     | SI1   | 261 |        |     | SI1   | 291 |        |    |
| SI1   | 75. |        |     | SI1   | 75. |        |     | SI1   | 299 |        |     | SI1   | 291 |        |    |
| SI1   | 75. |        |     | SI1   | 79. |        |     | SI1   | 243 |        |     | SI1   | 300 |        |    |
| SI1   | 75. |        |     | SI1   | 83. |        |     | SI1   | 191 |        |     | SI1   | 349 |        |    |
| SI2   | 75. |        |     | SI1   | 81. |        |     | SI1   | 227 |        |     | SI1   | 218 |        |    |
| SI0   | 75. |        |     | SI1   | 75. |        |     | SI1   | 231 |        |     | SI1   | 348 |        |    |
| SI0   | 75. |        |     | SI1   | 77. |        |     | SI1   | 230 |        |     | SI1   | 232 |        |    |
| SI1   | 75. |        |     | SI1   | 77. |        |     | SI1   | 141 |        |     | SI1   | 210 |        |    |
| SI2   | 75. |        |     | SI1   | 79. |        |     | SI1   | 254 |        |     | SI1   | 306 |        |    |
| SI0   | 75. |        |     | SI1   | 67. |        |     | SI1   | 173 |        |     | SI1   | 244 |        |    |
| SI0   | 75. |        |     | SI1   | 70. |        |     | SI1   | 305 |        |     | SI1   | 315 |        |    |
| SI1   | 75. |        |     | SI1   | 80. |        |     | SI1   | 261 |        |     | SI1   | 261 |        |    |
| SI1   | 75. |        |     | SI1   | 77. |        |     | SI1   | 103 |        |     | SI1   | 299 |        |    |
| SI1   | 76. |        |     | SI2   | 81. |        |     | SI1   | 335 |        |     | SI1   | 254 |        |    |
| SI2   | 76. |        |     | SI2   | 70. |        |     | SI1   | 336 |        |     | SI1   | 243 |        |    |
| SI1   | 76. |        |     | SI2   | 70. |        |     | SI1   | 115 |        |     | SI1   | 260 |        |    |
| SI0   | 76. |        |     | SI2   | 80. |        |     | SI1   | 120 |        |     | SI1   | 188 |        |    |
| SI1   | 76. |        |     | SI2   | 79. |        |     | SI1   | 126 |        |     | SI1   | 273 |        |    |
| SI0   | 76. |        |     | SI2   | 80. |        |     | SI1   | 205 |        |     | SI1   | 191 |        |    |
| SI1   | 76. |        |     | SI2   | 71. |        |     | SI1   | 98. |        |     | SI1   | 189 |        |    |
| SI0   | 76. |        |     | SI2   | 72. |        |     | SI1   | 239 |        |     | SI1   | 373 |        |    |
| SI2   | 76. |        |     | SI2   | 73. |        |     | SI1   | 307 |        |     | SI1   | 229 |        |    |
| SI0   | 76. |        |     | SI2   | 69. |        |     | SI1   | 237 |        |     | SI1   | 307 |        |    |
| SI0   | 76. |        |     | SI2   | 64. |        |     | SI1   | 196 |        |     | SI1   | 227 |        |    |
| SI0   | 76. |        |     | SI2   | 67. |        |     | SI1   | 229 |        |     | SI1   | 231 |        |    |

Table S5. Continued.

| Heading date (HD) | Grain weight per linear meter (GWPLM) |
|-------------------|---------------------------------------|
|-------------------|---------------------------------------|

| qDHHD.3H (bPb-0361, |     |        |     | qDHHD.4H.a |     |        |     | qGWYPLM.4H (bPb- |     |        |     | qGWYPLM.7H (bPb- |     |        |    |
|---------------------|-----|--------|-----|------------|-----|--------|-----|------------------|-----|--------|-----|------------------|-----|--------|----|
| Elite               |     | Exotic |     | Elite      |     | Exotic |     | Elite            |     | Exotic |     | Elite            |     | Exotic |    |
| Ave                 | 73. | Ave    | 72. | Ave        | 72. | Ave    | 75. | Ave              | 240 | Ave    | 200 | Ave              | 229 | Ave    | 27 |
| SI0                 | 76. |        |     | SI2        | 65. |        |     | SI1              | 134 |        |     | SI1              | 230 |        |    |
| SI1                 | 76. |        |     | SI2        | 70. |        |     | SI1              | 220 |        |     | SI1              | 141 |        |    |
| SI1                 | 77. |        |     | SI2        | 64. |        |     | SI2              | 138 |        |     | SI1              | 293 |        |    |
| SI1                 | 77. |        |     | SI2        | 76. |        |     | SI2              | 234 |        |     | SI1              | 217 |        |    |
| SI2                 | 77. |        |     | SI2        | 62. |        |     | SI2              | 180 |        |     | SI1              | 183 |        |    |
| SI0                 | 77. |        |     | SI2        | 78. |        |     | SI2              | 103 |        |     | SI1              | 254 |        |    |
| SI2                 | 77. |        |     | SI2        | 77. |        |     | SI2              | 119 |        |     | SI1              | 173 |        |    |
| SI0                 | 77. |        |     | SI2        | 67. |        |     | SI2              | 278 |        |     | SI1              | 217 |        |    |
| SI0                 | 77. |        |     | SI2        | 67. |        |     | SI2              | 202 |        |     | SI1              | 305 |        |    |
| SI1                 | 77. |        |     | SI2        | 72. |        |     | SI2              | 266 |        |     | SI1              | 176 |        |    |
| SI2                 | 77. |        |     | SI2        | 66. |        |     | SI2              | 270 |        |     | SI1              | 261 |        |    |
| SI1                 | 77. |        |     | SI2        | 58. |        |     | SI2              | 280 |        |     | SI1              | 230 |        |    |
| SI1                 | 78. |        |     | SI2        | 69. |        |     | SI2              | 273 |        |     | SI1              | 230 |        |    |
| SI1                 | 78. |        |     | SI2        | 69. |        |     | SI2              | 128 |        |     | SI1              | 103 |        |    |
| SI0                 | 78. |        |     | SI2        | 59. |        |     | SI2              | 156 |        |     | SI1              | 258 |        |    |
| SI1                 | 78. |        |     | SI2        | 76. |        |     | SI2              | 233 |        |     | SI1              | 335 |        |    |
| SI2                 | 78. |        |     | SI2        | 70. |        |     | SI2              | 204 |        |     | SI1              | 336 |        |    |
| SI0                 | 78. |        |     | SI2        | 64. |        |     | SI2              | 337 |        |     | SI1              | 115 |        |    |
| SI1                 | 78. |        |     | SI2        | 70. |        |     | SI2              | 277 |        |     | SI1              | 190 |        |    |
| SI1                 | 79. |        |     | SI2        | 67. |        |     | SI2              | 142 |        |     | SI1              | 162 |        |    |
| SI1                 | 79. |        |     | SI2        | 66. |        |     | SI2              | 332 |        |     | SI1              | 116 |        |    |
| SI1                 | 79. |        |     | SI2        | 70. |        |     | SI2              | 202 |        |     | SI1              | 146 |        |    |
| SI2                 | 79. |        |     | SI2        | 69. |        |     | SI2              | 340 |        |     | SI1              | 120 |        |    |
| SI1                 | 79. |        |     | SI2        | 79. |        |     | SI2              | 169 |        |     | SI1              | 116 |        |    |
| SI2                 | 79. |        |     | SI2        | 75. |        |     | SI2              | 113 |        |     | SI1              | 126 |        |    |
| SI1                 | 79. |        |     | SI2        | 75. |        |     | SI2              | 273 |        |     | SI1              | 205 |        |    |
| SI2                 | 79. |        |     | SI2        | 73. |        |     | SI2              | 242 |        |     | SI1              | 98. |        |    |
| SI0                 | 79. |        |     | SI2        | 74. |        |     | SI2              | 235 |        |     | SI1              | 198 |        |    |
| SI2                 | 79. |        |     | SI2        | 74. |        |     | SI2              | 242 |        |     | SI1              | 239 |        |    |
| SI1                 | 80. |        |     | SI2        | 76. |        |     | SI2              | 244 |        |     | SI1              | 307 |        |    |
| SI0                 | 80. |        |     | SI2        | 65. |        |     | SI2              | 188 |        |     | SI1              | 237 |        |    |
| SI0                 | 80. |        |     | SI2        | 79. |        |     | SI2              | 177 |        |     | SI1              | 196 |        |    |
| SI0                 | 80. |        |     | SI2        | 74. |        |     | SI2              | 134 |        |     | SI1              | 229 |        |    |
| SI1                 | 80. |        |     | SI2        | 61. |        |     | SI2              | 235 |        |     | SI1              | 134 |        |    |
| SI1                 | 80. |        |     | SI2        | 72. |        |     | SI2              | 202 |        |     | SI1              | 220 |        |    |
| SI1                 | 80. |        |     | SI2        | 63. |        |     | SI2              | 200 |        |     | SI2              | 138 |        |    |
| SI2                 | 80. |        |     | SI2        | 68. |        |     | SI2              | 177 |        |     | SI2              | 234 |        |    |
| SI0                 | 80. |        |     | SI2        | 64. |        |     | SI2              | 183 |        |     | SI2              | 180 |        |    |
| SI2                 | 80. |        |     | SI2        | 70. |        |     | SI2              | 196 |        |     | SI2              | 103 |        |    |
| SI0                 | 80. |        |     | SI2        | 74. |        |     | SI2              | 138 |        |     | SI2              | 145 |        |    |
| SI2                 | 80. |        |     | SI2        | 76. |        |     | SI2              | 218 |        |     | SI2              | 94. |        |    |
| SI1                 | 81. |        |     | SI2        | 63. |        |     | SI2              | 201 |        |     | SI2              | 91. |        |    |
| SI1                 | 81. |        |     | SI2        | 71. |        |     | SI2              | 218 |        |     | SI2              | 290 |        |    |
| SI2                 | 81. |        |     | SI2        | 71. |        |     | SI2              | 245 |        |     | SI2              | 73. |        |    |
| SI1                 | 81. |        |     | SI2        | 73. |        |     | SI2              | 288 |        |     | SI2              | 126 |        |    |

Table S5. Continued.

| Heading date (HD)   |     |        |     |            |     |        |     | Grain weight per linear meter (GWPLM) |     |        |     |                  |     |        |     |
|---------------------|-----|--------|-----|------------|-----|--------|-----|---------------------------------------|-----|--------|-----|------------------|-----|--------|-----|
| qDHHD.3H (bPb-0361, |     |        |     | qDHHD.4H.a |     |        |     | qGWYPLM.4H (bPb-                      |     |        |     | qGWYPLM.7H (bPb- |     |        |     |
| Elite               |     | Exotic |     | Elite      |     | Exotic |     | Elite                                 |     | Exotic |     | Elite            |     | Exotic |     |
| Av                  | 73. | Ave    | 72. | Ave        | 72. | Ave    | 75. | Ave                                   | 240 | Ave    | 200 | Ave              | 229 | Ave    | 277 |
| SI1                 | 81. |        |     | SI2        | 69. |        |     | SI2                                   | 190 |        |     | SI2              | 144 |        |     |
| SI1                 | 82. |        |     | SI2        | 71. |        |     | SI2                                   | 211 |        |     | SI2              | 119 |        |     |
| SI2                 | 82. |        |     | SI2        | 79. |        |     | SI2                                   | 131 |        |     | SI2              | 145 |        |     |
| SI1                 | 82. |        |     | SI2        | 64. |        |     | SI2                                   | 213 |        |     | SI2              | 186 |        |     |
| SI1                 | 83. |        |     | SI2        | 62. |        |     | SI2                                   | 394 |        |     | SI2              | 278 |        |     |
| SI1                 | 83. |        |     | SI2        | 67. |        |     | SI3                                   | 190 |        |     | SI2              | 202 |        |     |
| SI0                 | 83. |        |     | SI2        | 66. |        |     | SI3                                   | 145 |        |     | SI2              | 170 |        |     |
| SI0                 | 84. |        |     | SI2        | 62. |        |     | SI3                                   | 306 |        |     | SI2              | 338 |        |     |
|                     |     |        |     | SI2        | 79. |        |     | SI3                                   | 214 |        |     | SI2              | 266 |        |     |
|                     |     |        |     | SI2        | 65. |        |     | SI3                                   | 242 |        |     | SI2              | 241 |        |     |
|                     |     |        |     | SI2        | 78. |        |     | SI3                                   | 211 |        |     | SI2              | 270 |        |     |
|                     |     |        |     | SI2        | 77. |        |     | SI3                                   | 321 |        |     | SI2              | 280 |        |     |
|                     |     |        |     | SI2        | 81. |        |     | SI3                                   | 392 |        |     | SI2              | 273 |        |     |
|                     |     |        |     | SI2        | 58. |        |     | SI3                                   | 329 |        |     | SI2              | 128 |        |     |
|                     |     |        |     | SI2        | 80. |        |     | SI3                                   | 222 |        |     | SI2              | 156 |        |     |
|                     |     |        |     | SI2        | 81. |        |     | SI3                                   | 301 |        |     | SI2              | 233 |        |     |
|                     |     |        |     | SI2        | 68. |        |     | SI3                                   | 205 |        |     | SI2              | 212 |        |     |
|                     |     |        |     | SI3        | 76. |        |     | SI3                                   | 216 |        |     | SI2              | 324 |        |     |
|                     |     |        |     | SI3        | 72. |        |     | SI3                                   | 218 |        |     | SI2              | 204 |        |     |
|                     |     |        |     | SI3        | 71. |        |     | SI3                                   | 137 |        |     | SI2              | 277 |        |     |
|                     |     |        |     | SI3        | 70. |        |     | SI3                                   | 199 |        |     | SI2              | 142 |        |     |
|                     |     |        |     | SI3        | 75. |        |     | SI3                                   | 212 |        |     | SI2              | 302 |        |     |
|                     |     |        |     | SI3        | 66. |        |     | SI3                                   | 168 |        |     | SI2              | 332 |        |     |
|                     |     |        |     | SI3        | 70. |        |     | SI3                                   | 192 |        |     | SI2              | 202 |        |     |
|                     |     |        |     | SI3        | 67. |        |     | SI3                                   | 270 |        |     | SI2              | 422 |        |     |
|                     |     |        |     | SI3        | 66. |        |     | SI3                                   | 194 |        |     | SI2              | 169 |        |     |
|                     |     |        |     | SI3        | 68. |        |     | SI3                                   | 210 |        |     | SI2              | 113 |        |     |
|                     |     |        |     | SI3        | 79. |        |     | SI3                                   | 177 |        |     | SI2              | 273 |        |     |
|                     |     |        |     | SI3        | 78. |        |     | SI3                                   | 203 |        |     | SI2              | 242 |        |     |
|                     |     |        |     | SI3        | 81. |        |     | SI3                                   | 219 |        |     | SI2              | 223 |        |     |
|                     |     |        |     | SI3        | 73. |        |     |                                       |     |        |     | SI2              | 235 |        |     |
|                     |     |        |     | SI3        | 69. |        |     |                                       |     |        |     | SI2              | 254 |        |     |
|                     |     |        |     | SI3        | 70. |        |     |                                       |     |        |     | SI2              | 226 |        |     |
|                     |     |        |     | SI3        | 72. |        |     |                                       |     |        |     | SI2              | 233 |        |     |
|                     |     |        |     | SI3        | 74. |        |     |                                       |     |        |     | SI2              | 182 |        |     |
|                     |     |        |     | SI3        | 68. |        |     |                                       |     |        |     | SI2              | 242 |        |     |
|                     |     |        |     | SI3        | 61. |        |     |                                       |     |        |     | SI2              | 244 |        |     |
|                     |     |        |     | SI3        | 77. |        |     |                                       |     |        |     | SI2              | 188 |        |     |
|                     |     |        |     | SI3        | 59. |        |     |                                       |     |        |     | SI2              | 177 |        |     |
|                     |     |        |     | SI3        | 63. |        |     |                                       |     |        |     | SI2              | 176 |        |     |
|                     |     |        |     | SI3        | 62. |        |     |                                       |     |        |     | SI2              | 134 |        |     |
|                     |     |        |     | SI3        | 64. |        |     |                                       |     |        |     | SI2              | 369 |        |     |
|                     |     |        |     | SI3        | 70. |        |     |                                       |     |        |     | SI2              | 183 |        |     |
|                     |     |        |     | SI3        | 73. |        |     |                                       |     |        |     | SI2              | 235 |        |     |
|                     |     |        |     |            |     |        |     |                                       |     |        |     | SI2              | 205 |        |     |

Table S5. Continued.

| Heading date (HD)   |     |        |     |            |     |        |     | Grain weight per linear meter (GWPLM) |     |        |     |                  |     |        |     |
|---------------------|-----|--------|-----|------------|-----|--------|-----|---------------------------------------|-----|--------|-----|------------------|-----|--------|-----|
| qDHHD.3H (bPb-0361, |     |        |     | qDHHD.4H.a |     |        |     | qGWYPLM.4H (bPb-                      |     |        |     | qGWYPLM.7H (bPb- |     |        |     |
| Elite               |     | Exotic |     | Elite      |     | Exotic |     | Elite                                 |     | Exotic |     | Elite            |     | Exotic |     |
| Ave                 | 73. | Ave    | 72. | Ave        | 72. | Ave    | 75. | Ave                                   | 240 | Ave    | 200 | Ave              | 229 | Ave    | 277 |
|                     |     |        |     |            |     |        |     |                                       |     |        |     | SI2              | 202 |        |     |
|                     |     |        |     |            |     |        |     |                                       |     |        |     | SI2              | 200 |        |     |
|                     |     |        |     |            |     |        |     |                                       |     |        |     | SI2              | 177 |        |     |
|                     |     |        |     |            |     |        |     |                                       |     |        |     | SI2              | 183 |        |     |
|                     |     |        |     |            |     |        |     |                                       |     |        |     | SI2              | 196 |        |     |
|                     |     |        |     |            |     |        |     |                                       |     |        |     | SI2              | 156 |        |     |
|                     |     |        |     |            |     |        |     |                                       |     |        |     | SI2              | 138 |        |     |
|                     |     |        |     |            |     |        |     |                                       |     |        |     | SI2              | 218 |        |     |
|                     |     |        |     |            |     |        |     |                                       |     |        |     | SI2              | 161 |        |     |
|                     |     |        |     |            |     |        |     |                                       |     |        |     | SI2              | 201 |        |     |
|                     |     |        |     |            |     |        |     |                                       |     |        |     | SI2              | 218 |        |     |
|                     |     |        |     |            |     |        |     |                                       |     |        |     | SI2              | 245 |        |     |
|                     |     |        |     |            |     |        |     |                                       |     |        |     | SI2              | 288 |        |     |
|                     |     |        |     |            |     |        |     |                                       |     |        |     | SI2              | 190 |        |     |
|                     |     |        |     |            |     |        |     |                                       |     |        |     | SI2              | 211 |        |     |
|                     |     |        |     |            |     |        |     |                                       |     |        |     | SI2              | 131 |        |     |
|                     |     |        |     |            |     |        |     |                                       |     |        |     | SI2              | 241 |        |     |
|                     |     |        |     |            |     |        |     |                                       |     |        |     | SI2              | 214 |        |     |
|                     |     |        |     |            |     |        |     |                                       |     |        |     | SI2              | 213 |        |     |
|                     |     |        |     |            |     |        |     |                                       |     |        |     | SI2              | 394 |        |     |
|                     |     |        |     |            |     |        |     |                                       |     |        |     | SI3              | 190 |        |     |
|                     |     |        |     |            |     |        |     |                                       |     |        |     | SI3              | 145 |        |     |
|                     |     |        |     |            |     |        |     |                                       |     |        |     | SI3              | 306 |        |     |
|                     |     |        |     |            |     |        |     |                                       |     |        |     | SI3              | 214 |        |     |
|                     |     |        |     |            |     |        |     |                                       |     |        |     | SI3              | 242 |        |     |
|                     |     |        |     |            |     |        |     |                                       |     |        |     | SI3              | 211 |        |     |
|                     |     |        |     |            |     |        |     |                                       |     |        |     | SI3              | 321 |        |     |
|                     |     |        |     |            |     |        |     |                                       |     |        |     | SI3              | 392 |        |     |
|                     |     |        |     |            |     |        |     |                                       |     |        |     | SI3              | 329 |        |     |
|                     |     |        |     |            |     |        |     |                                       |     |        |     | SI3              | 222 |        |     |
|                     |     |        |     |            |     |        |     |                                       |     |        |     | SI3              | 301 |        |     |
|                     |     |        |     |            |     |        |     |                                       |     |        |     | SI3              | 205 |        |     |
|                     |     |        |     |            |     |        |     |                                       |     |        |     | SI3              | 216 |        |     |
|                     |     |        |     |            |     |        |     |                                       |     |        |     | SI3              | 218 |        |     |
|                     |     |        |     |            |     |        |     |                                       |     |        |     | SI3              | 137 |        |     |
|                     |     |        |     |            |     |        |     |                                       |     |        |     | SI3              | 199 |        |     |
|                     |     |        |     |            |     |        |     |                                       |     |        |     | SI3              | 212 |        |     |
|                     |     |        |     |            |     |        |     |                                       |     |        |     | SI3              | 174 |        |     |
|                     |     |        |     |            |     |        |     |                                       |     |        |     | SI3              | 147 |        |     |
|                     |     |        |     |            |     |        |     |                                       |     |        |     | SI3              | 168 |        |     |
|                     |     |        |     |            |     |        |     |                                       |     |        |     | SI3              | 192 |        |     |
|                     |     |        |     |            |     |        |     |                                       |     |        |     | SI3              | 270 |        |     |
|                     |     |        |     |            |     |        |     |                                       |     |        |     | SI3              | 192 |        |     |
|                     |     |        |     |            |     |        |     |                                       |     |        |     | SI3              | 260 |        |     |
|                     |     |        |     |            |     |        |     |                                       |     |        |     | SI3              | 194 |        |     |

Table S5. Continued.



| Heading date (HD)   |     |        |     |            |     |        |     | Grain weight per linear meter (GWPLM) |     |        |     |                  |     |        |     |
|---------------------|-----|--------|-----|------------|-----|--------|-----|---------------------------------------|-----|--------|-----|------------------|-----|--------|-----|
| qDHHD.3H (bPb-0361, |     |        |     | qDHHD.4H.a |     |        |     | qGWYPLM.4H (bPb-                      |     |        |     | qGWYPLM.7H (bPb- |     |        |     |
| Elite               |     | Exotic |     | Elite      |     | Exotic |     | Elite                                 |     | Exotic |     | Elite            |     | Exotic |     |
| Ave                 | 73. | Ave    | 72. | Ave        | 72. | Ave    | 75. | Ave                                   | 240 | Ave    | 200 | Ave              | 229 | Ave    | 277 |
|                     |     |        |     |            |     |        |     |                                       |     |        |     | Si3              | 210 |        |     |
|                     |     |        |     |            |     |        |     |                                       |     |        |     | Si3              | 177 |        |     |
|                     |     |        |     |            |     |        |     |                                       |     |        |     | Si3              | 203 |        |     |
|                     |     |        |     |            |     |        |     |                                       |     |        |     | Si3              | 219 |        |     |

**Table S6.** Co-location of the detected QTL in the current study.

| Chr.      | Marker    | Type | Pos.   | Traits   |           |           |              |
|-----------|-----------|------|--------|----------|-----------|-----------|--------------|
| <b>1H</b> | bPb_0405  | DArT | 7.21   | STI (GW) | STI (BW)  | STI (HI)  |              |
| <b>3H</b> | HVM33     | SSR  | 83     | NSPLM    | TGW       |           |              |
|           | HV13GEIII | SSR  | 150    | PH       | STI (PH)  | STI (TGW) |              |
| <b>4H</b> | HVPAZXG   | SSR  | 44.0   | HD       | STI (DH)  |           |              |
|           | bPb_3512  | DArT | 67.92  | STI (GW) | STI (BW)  |           |              |
|           | bPb_3739  | DArT | 96.3   | GWPLM    | BWPLM     |           |              |
|           | Mlo       | SSR  | 127.5  | STI (HI) | STI (TGW) |           |              |
| <b>7H</b> | bPb_8161  | DArT | 2.2    | GWPLM    | BWPLM     |           |              |
|           | bPb_6706  | DArT | 58.17  | STI (GW) | STI (BW)  |           |              |
|           | bPb_5260  | DArT | 115.56 | HD       | PH        | HI        | TGW STI (BW) |

Chr. is chromosome, Marker, is the marker that showed pleiotropic effects, Type is the marker type, and Pos., is the chromosomal position of the marker.

**Table S7.** The functional annotation of some putative candidate genes associated with the studied traits under salinity conditions.

| Trait                              | Chr | Marker            | Start (bp)  | End (bp)    | Overlapping gene or nearest gene   | Start (bp)  | End (bp)    | Annotation                                                                                |
|------------------------------------|-----|-------------------|-------------|-------------|------------------------------------|-------------|-------------|-------------------------------------------------------------------------------------------|
| STI (GWPLM), STI (BWPLM), STI (HI) | 1   | bPb-0405          | 702,983     | 703,298     | HORVU1Hr1G000250                   | 701,253     | 708,742     | P-loop containing nucleoside triphosphate hydrolase                                       |
| STI (GWPLM)                        | 1   | bPb-1604          | 40,030,953  | 40,031,336  | HORVU1Hr1G014420.1.1               | 40,031,428  | 40,031,998  | Coding unknown protien                                                                    |
| STI (HI)                           | 1   | bPb-2240          | 532,588,275 | 532,589,050 | HORVU1Hr1G083800.1                 | 532,585,748 | 532,587,466 | Anaerobic coproporphyrinogen-III oxidase                                                  |
| PH                                 | 1   | GMS21             | 117,671,240 | 117,671,256 | HORVU1Hr1G024870.1                 | 117,662,362 | 117,665,320 | Glycerophosphodiester phosphodiesterase domain                                            |
| STI (NSPLM)                        | 1   | S53707            | 11,165,978  | 11,165,998  | HORVU1Hr1G005110.1                 | 11,164,570  | 11,166,159  | Metallothionein, family 15, plant                                                         |
| HI                                 | 2   | bPb-6088          | 605,502,245 | 605,502,718 | HORVU2Hr1G083450                   | 605,489,345 | 605,515,390 | Coding unknown protien                                                                    |
| HI                                 | 2   | bPb-6088          | 605,502,245 | 605,502,718 | HORVU2Hr1G083430                   | 605,299,287 | 605,627,303 | TAZ domain superfamily                                                                    |
| STI (TGW)                          | 2   | HVM36             | 22,074,544  | 22,074,562  | HORVU2Hr1G011070.4                 | 22,072,805  | 22,074,721  | No protein                                                                                |
| STI (TGW)                          | 2   | HVM36             | 22,074,544  | 22,074,562  | HORVU2Hr1G011090.1.1               | 22,075,294  | 22,076,262  | Coding unknown protien                                                                    |
| HD                                 | 3   | bPb-0361/bPb-4169 | 683,882,336 | 683,882,585 | HORVU3Hr1G111650.1                 | 683,876,197 | 683,876,447 | NAD(P)-binding domain superfamily                                                         |
| TGW                                | 3   | bPb-7724          | 695,337,456 | 695,337,645 | HORVU3Hr1G116150.2                 | 695,340,363 | 695,353,414 | Coding unknown protien                                                                    |
| STI (HD)                           | 3   | bPb-0789          | 667,535,233 | 667,535,847 | HORVU3Hr1G104940                   | 667,534,942 | 667,537,208 | Leucine-rich repeat-containing N-terminal, plant-type                                     |
| STI (TGW)                          | 3   | bPb-4472          | 988,128     | 988,665     | HORVU3Hr1G000390.2                 | 1,000,734   | 1,009,504   | 1-deoxy-D-xylulose 5-phosphate reductoisomerase, N-terminal                               |
| NSPLM, TGW                         | 3   | HVM33             | 544,865,867 | 544,865,891 | HORVU3Hr1G072340.1                 | 544,890,480 | 544,896,649 | B3 DNA binding domain, Auxin response factor                                              |
| STI (PH)                           | 3   | HV13GEIII         | 552,526,028 | 552,526,052 | HORVU3Hr1G073140.1                 | 552,518,239 | 552,519,222 | RlpA-like protein, double-psi beta-barrel domain, Expansin, cellulose-binding-like domain |
| HI                                 | 3   | HVLTTPPB          | 20,120,978  | 20,121,002  | HORVU3Hr1G009360, HORVU3Hr1G009370 | 20,119,499  | 20,121,584  | Bifunctional inhibitor/plant lipid transfer protein/seed storage helical domain           |
| HD                                 | 4   | HVPAZXG           | 47,808,781  | 47,809,614  | HORVU4Hr1G013540.3                 | 47,808,781  | 47,809,614  | Protein kinase domain                                                                     |
| HD                                 | 4   | bPb-6640/bPb-6611 | 35,787,129  | 35,787,532  | HORVU4Hr1G011500                   | 35,787,129  | 35,787,532  | Serine hydroxymethyltransferase-like domain                                               |
| GWPLM, BWPLM                       | 4   | bPb-3739          | 595,321,440 | 595,321,671 | HORVU4Hr1G074740.4                 | 595,326,889 | 595,329,230 | MFS transporter superfamily                                                               |
| BWPLM                              | 4   | bPb-5480          | 503,102,630 | 503,115,987 | HORVU4Hr1G059980.4                 | 503,102,675 | 503,113,026 | tRNA methyltransferase, Trm1                                                              |
| STI (HD), HD                       | 4   | HvPAZXG           | 47,809,743  | 47,809,762  | HORVU4Hr1G013550                   | 47,808,567  | 47,811,193  | Serpin domain                                                                             |
| NSPLM                              | 4   | MGB396            | 599,170,397 | 599,170,419 | HORVU4Hr1G075730.1.1               | 599,169,608 | 599,171,737 | Coding unknown protien                                                                    |

HD is heading date (days), PH is plant height (cm), NSPLM is number of spikes per linear meter (spikes  $\text{lm}^{-1}$ ), GWPLM is grain weight per linear meter ( $\text{g lm}^{-1}$ ), BWPLM is biological weight per linear meter ( $\text{g lm}^{-1}$ ), HI is harvest index (%), and TGW is thousand grain weight (g).

| Trait                    | Chr | Marker    | Start (bp)  | End (bp)    | Overlapping gene or nearest gene | Start (bp)  | End (bp)    | Annotation                                             |
|--------------------------|-----|-----------|-------------|-------------|----------------------------------|-------------|-------------|--------------------------------------------------------|
| STI (TGW), STI (HI)      | 4   | Mlo       | 225,213,247 | 225,235,255 | HORVU4Hr1G032760                 | 225,213,24  | 225,214,293 | Peptide chain release factor                           |
| STI (TGW)                | 4   | GMS89     | 100,740,190 | 100,740,208 | HORVU4Hr1G020330                 | 100,702,684 | 100,703,118 | Coding unknown protien                                 |
| PH                       | 5   | Bmag357   | 348,163,596 | 348,163,618 | HORVU5Hr1G045010.1               | 348,103,655 | 348,105,073 | Coding unknown protien                                 |
| PH                       | 5   | AF043094A | 616,115,030 | 616,115,050 | HORVU5Hr1G103460.1               | 616,115,069 | 616,116,208 | Dehydrin                                               |
| HD, HI, TGW, STI (BWPLM) | 7   | bPb-5260  | 604,850,617 | 604,851,429 | HORVU7Hr1G100410.1               | 604,848,339 | 604,848,974 | CENP-T/Histone H4, histone fold                        |
| GWPLM, BWPLM             | 7   | bPb-8161  | 350,775,868 | 350,775,892 | HORVU7Hr1G067270.1               | 350,770,174 | 350,770,200 | OS12G0169200 PROTEIN (Conserved hypothetical protein.) |
| STI (GWPLM), STI (BWPLM) | 7   | bPb-6706  | 63,334,413  | 63,334,861  | HORVU7Hr1G031250.1               | 63,328,326  | 63,330,455  | CAP domain                                             |

HD is heading date (days), PH is plant height (cm), NSPLM is number of spikes per linear meter (spikes  $\text{lm}^{-1}$ ), GWPLM is grain weight per linear meter ( $\text{g lm}^{-1}$ ), BWPLM is biological weight per linear meter ( $\text{g lm}^{-1}$ ), HI is harvest index (%), and TGW is thousand grain weight (g).
